# Supplementary material
Source: PubMed Central journal article supplement (PMC3579145)
Supplement: emboj20134s2.pdf [file emboj20134s2.pdf]

**Table SI. Selecting the UBD:Ub templates for scanning the PDB**

| Interface<br>PDB:Receptor:Ligand | Domain                   | Hit list                                                                                         | Count    |
|----------------------------------|--------------------------|--------------------------------------------------------------------------------------------------|----------|
| 1NBF:A:D                         | USP7                     | 2AYO:A:B, 2HD5:A:B, 2IBI:A:B, 3I3T:A:B, 3IHP:A:C, 3MHS:A:D, 3NHE:A:B                             | 7        |
| 1P3Q:QR:V                        | CUE Domain of VPS9       | 2D3G:P:A, 3NHE:A:B, 3O65:A:B, 3VHT:B:C                                                           | 4        |
| 1S1Q:A:B                         | TSG101(UEV)              | 1UZX:A:B                                                                                         | 1        |
| 1UZX:A:B                         | VPS23 UEV                | 1S1Q:A:B                                                                                         | 1        |
| 1WR6:D:H                         | GGA3 GAT                 | 1WRD:A:B, 1YD8:H:U, 2QHO:H:G                                                                     | 3        |
| 1WRD:A:B                         | Tom1 GAT                 | 1WR6:D:H, 1YD8:H:U, 2D3G:P:A, 3VHT:B:C                                                           | 4        |
| 1XD3:A:B                         | UCHL3-UbVME              | 2WDT:C:B, 3IFW:A:B, 3KVF:A:B, 3KW5:A:B                                                           | 4        |
| 1YD8:H:U                         | GGA3 GAT                 | 1P3Q:QR:V, 1WR6:D:H, 1WRD:A:B, 2D3G:P:B, 2QHO:H:G, 3K9P:A:B, 3VHT:B:C                            | 7        |
| 2AYO:A:B                         | USP14                    | 1NBF:A:D, 2D3G:P:A, 2HD5:A:B, 2IBI:A:B, 3I3T:A:B, 3IHP:A:C, 3MHS:A:D, 3NHE:A:B                   | 8        |
| 2C7M:A:B                         | Rabex-5                  | 2D3G:P:A, 2D3G:P:B, 2FIF:B:A, 2O0B:A:B                                                           | 4        |
| 2D3G:P:A                         | Double sided Hrs-UIM     | 2C7M:A:B, 2D3G:P:B, 2FIF:B:A, 2O0B:A:B, 2QHO:H:G                                                 | 5        |
| 2D3G:P:B                         | Double sided Hrs-UIM     | 2C7M:A:B, 2D3G:P:A, 2FIF:B:A, 2O0B:A:B, 3O65:A:B, 3OJ3:N:A                                       | 6        |
| 2DX5:A:B                         | EAP45-GLUE               | 1WR6:D:H, 2HTH:B:A, 3O65:A:B                                                                     | 3        |
| 2FIF:B:A                         | Rabex-5                  | 2C7M:A:B, 2D3G:P:A, 2D3G:P:B, 2O0B:A:B, 2QHO:H:G                                                 | 5        |
| 2G45:A:B                         | ZNF UBP                  |                                                                                                  | 0        |
| 2GM1:A:C                         | Mms2/Ubc13               | 3OF1:A:C                                                                                         | 1        |
| 2HD5:A:B                         | USP2                     | 1NBF:A:D, 2AYO:A:B, 2IBI:A:B, 3I3T:A:B, 3IHP:A:C, 3MHS:A:D, 3NHE:A:B                             | 7        |
| 2HTH:B:A                         | EAP45/ESCRT-II GLUE      | 2DX5:A:B                                                                                         | 1        |
| 2IBI:A:B                         | USP2                     | 1NBF:A:D, 2AYO:A:B, 2HD5:A:B, 3I3T:A:B, 3IHP:A:C, 3MHS:A:D, 3NHE:A:B                             | 7        |
| 2J7Q:A:B                         | M48(USP)                 | 2D3G:P:B, 2WDT:C:B, 3PT2:A:B, 3TMP:A:B                                                           | 4        |
| 2O0B:A:B                         | Cbl-b UBA                | 2D3G:P:A, 2D3G:P:B, 2FIF:B:A                                                                     | 3        |
| 2QHO:H:G                         | EDD UBA                  | 1WR6:D:H, 1WRD:A:B, 1YD8:H:U, 2C7M:A:B, 2D3G:P:A, 2FIF:B:A, 3K9P:A:B, 3O65:A:B, 3VHT:B:C         | 9        |
| 2WDT:C:B                         | Nedd8 hydrolase UCHL3    | 1XD3:A:B, 3IFW:A:B, 3KVF:A:B, 3KW5:A:B                                                           | 4        |
| 2WWZ:C:A                         | TAB2 NZF                 |                                                                                                  | 0        |
| 2XBB:A:C                         | NEDD4 HECT               | 3IFW:A:B, 3OLM:A:D                                                                               | 2        |
| 3A33:A:B                         | UbcH5b                   |                                                                                                  | 0        |
| 3A9K:C:A                         | TAB3-NZF                 |                                                                                                  | 0        |
| 3A9K:C:B                         | TAB3-NZF                 | 2D3G:P:B                                                                                         | 1        |
| 3BY4:A:B                         | OTU                      | 3C0R:A:B, 3O65:A:B, 3TMP:A:B                                                                     | 3        |
| 3C0R:A:B                         | OTU                      | 3BY4:A:B, 3O65:A:B, 3TMP:A:B                                                                     | 3        |
| 3CMM:A:B                         | UBA1                     | 3NHE:A:B                                                                                         | 1        |
| 3I3T:A:B                         | USP21                    | 1NBF:A:D, 2AYO:A:B, 2HD5:A:B, 2IBI:A:B, 3IHP:A:C, 3MHS:A:D, 3NHE:A:B                             | 7        |
| 3IFW:A:B                         | L1 (UCHL1)               | 1XD3:A:B, 2WDT:C:B, 3C0R:A:B, 3KVF:A:B, 3KW5:A:B                                                 | 5        |
| 3IHP:A:C                         | USP5                     | 1NBF:A:D, 2AYO:A:B, 2HD5:A:B, 2IBI:A:B, 3I3T:A:B, 3MHS:A:D, 3NHE:A:B                             | 7        |
| 3JSV:CD:A                        | NEMO CoZi                | 2D3G:P:B, 2FIF:B:A, 3OJ3:N:A, 3TMP:A:B                                                           | 4        |
| 3JVZ:C:X                         | HECT(NEDD4L)             |                                                                                                  | 0        |
| <b>3K9P:A:B</b>                  | <b>E2-25K/UBB+1</b>      | <b>1P3Q:QR:V, 1WR6:D:H, 1WRD:A:B, 1YD8:H:U, 2D3G:P:A, 2D3G:P:B, 2QHO:H:G, 3TMP:A:B, 3VHT:B:C</b> | <b>9</b> |
| 3KVF:A:B                         | L1 (UCHL1)               | 1XD3:A:B, 2WDT:C:B, 3IFW:A:B, 3KW5:A:B, 3O65:A:B                                                 | 5        |
| 3KW5:A:B                         | L1 (UCHL1)               | 1XD3:A:B, 2WDT:C:B, 3C0R:A:B, 3IFW:A:B, 3KVF:A:B                                                 | 5        |
| 3LDZ:C:F                         | STAM1 VHS                | 1WR6:D:H, 1YD8:H:U                                                                               | 2        |
| 3MHS:A:D                         | SAGA DUB                 | 2HD5:A:B, 2IBI:A:B, 3I3T:A:B, 3MTN:A:B, 3NHE:A:B                                                 | 5        |
| 3MTN:A:B                         | USP21                    | 3NHE:A:B                                                                                         | 1        |
| 3NHE:A:B                         | USP2a                    | 1NBF:A:D, 2AYO:A:B, 2HD5:A:B, 2IBI:A:B, 3I3T:A:B, 3IHP:A:C, 3MHS:A:D                             | 7        |
| 3O65:A:B                         | Josephin                 | 2D3G:P:B, 3BY4:A:B, 3C0R:A:B                                                                     | 3        |
| 3OF1:A:C                         | insulin-degrading enzyme |                                                                                                  | 0        |
| 3OJ3:N:A                         | A20 ZnF4                 | 1WRD:A:B, 3PHW:A:B                                                                               | 2        |
| 3OLM:A:D                         | Rsp5 HECT                | 2XBB:A:C                                                                                         | 1        |
| 3PHW:A:B                         | OTU                      | 2IBI:A:B, 3PRM:A:B, 3PT2:A:B                                                                     | 3        |
| 3PRM:A:B                         | OTU                      | 3I3T:A:B, 3PHW:A:B, 3PT2:A:B                                                                     | 3        |
| 3PT2:A:B                         | OTU                      | 3PHW:A:B, 3PRM:A:B                                                                               | 2        |
| 3PTF:A:C                         | UbcH5A                   | 2QHO:H:G, 3O65:A:B                                                                               | 2        |
| 3TBL:A:D                         | PCNA                     |                                                                                                  | 0        |
| 3TMP:A:B                         | DUBA                     | 1NBF:A:D, 2AYO:A:B, 2D3G:P:A, 2D3G:P:B, 2HD5:A:B, 3BY4:A:B, 3C0R:A:B                             | 7        |
| 3VHT:B:C                         | GFP-Wrnip1 UBZ           | 1YD8:H:U, 2QHO:H:G, 3OJ3:N:A                                                                     | 3        |

The physico-chemical "signature" of 54 known UBD:Ub complexes at the Ub-I44 patch were used to structurally scan each others using the SiteEngine algorithm. The number of hits (excluding self) in which a given UBD finds other UBDs is listed as (see counts). 3K9P obtained the highest count and subsequently was used to scan the PDB for unknown UBDs.
